# Supplementary material for: Anion recognition properties of chromone-based organic and organic–inorganic hybrid nanoparticles
Source: Royal Society of Chemistry journal article supplement (doi:10.1039/c4ay01050g), 2014-05-27
Supplement: c4ay01050g1.pdf [file c4ay01050g1.pdf]

## Supplementary Information

### Anion Recognition Properties of Chromone-Based Organic Nanoparticles and Organic-Inorganic Hybrid Nanoparticles

Rajinder Kaur,<sup>a</sup> Amanpreet Kaur,<sup>a</sup> Gurbinder Singh,<sup>b</sup> Manoj Kumar,<sup>b</sup> Navneet Kaur<sup>a,\*</sup>

<sup>a</sup>Centre for Nanoscience and Nanotechnology (UIEAST), Panjab University, Chandigarh, India, 160014. Tel: 91-1722534464; E-mail: [navneetkaur@pu.ac.in](mailto:navneetkaur@pu.ac.in)

<sup>b</sup>Department of Chemistry, LPU, Phagwara, Punjab-144 806, India.

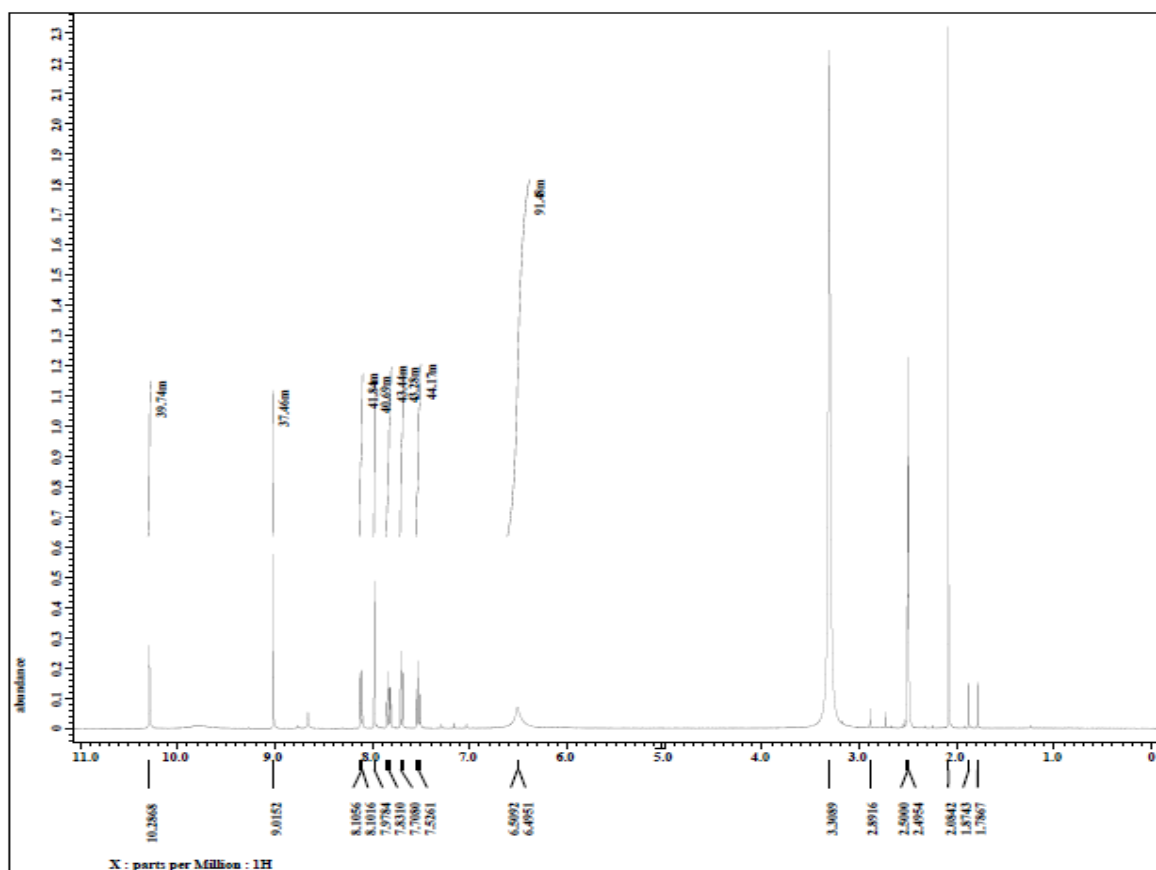

Figure S1. <sup>1</sup>H NMR spectrum of compound 1

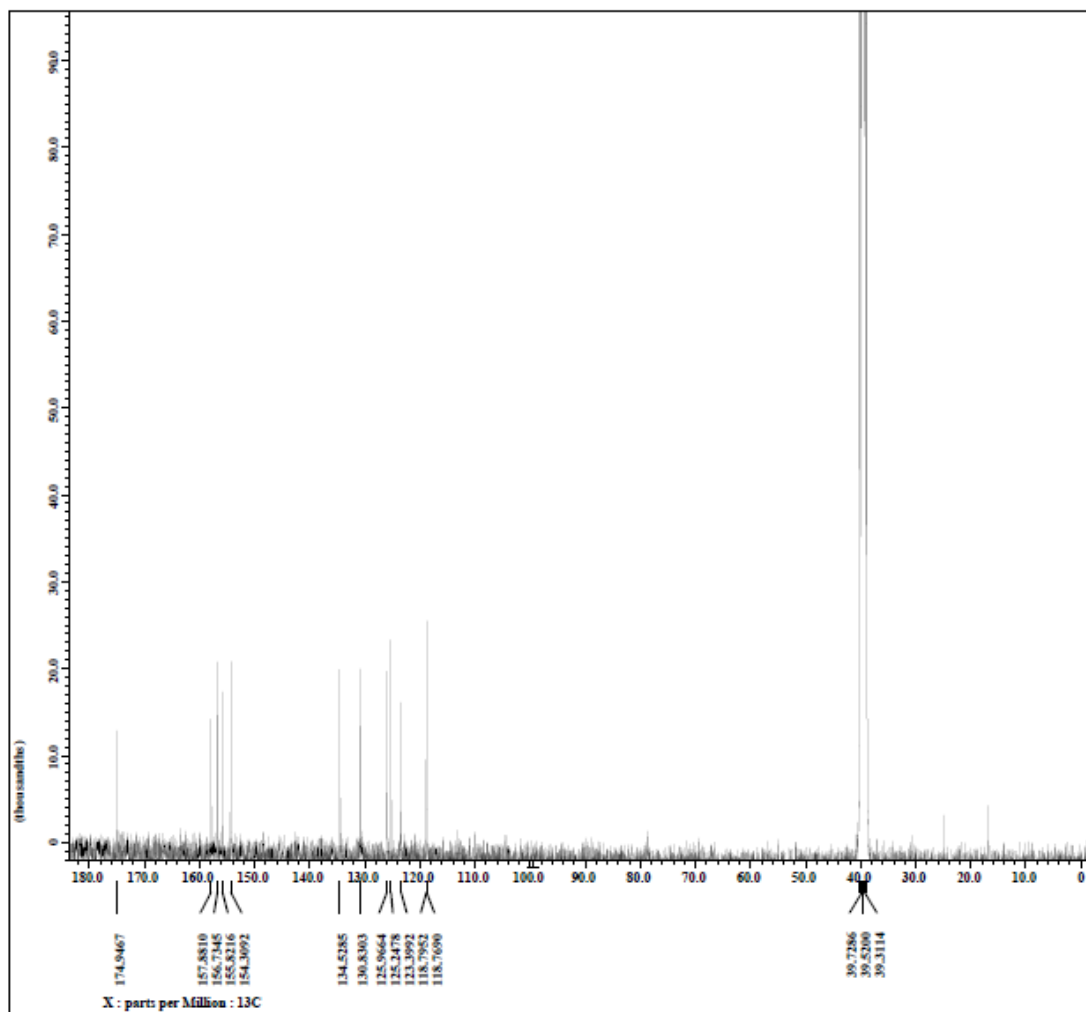

**Figure S2.**  $^{13}\text{C}$  NMR spectrum of compound 1

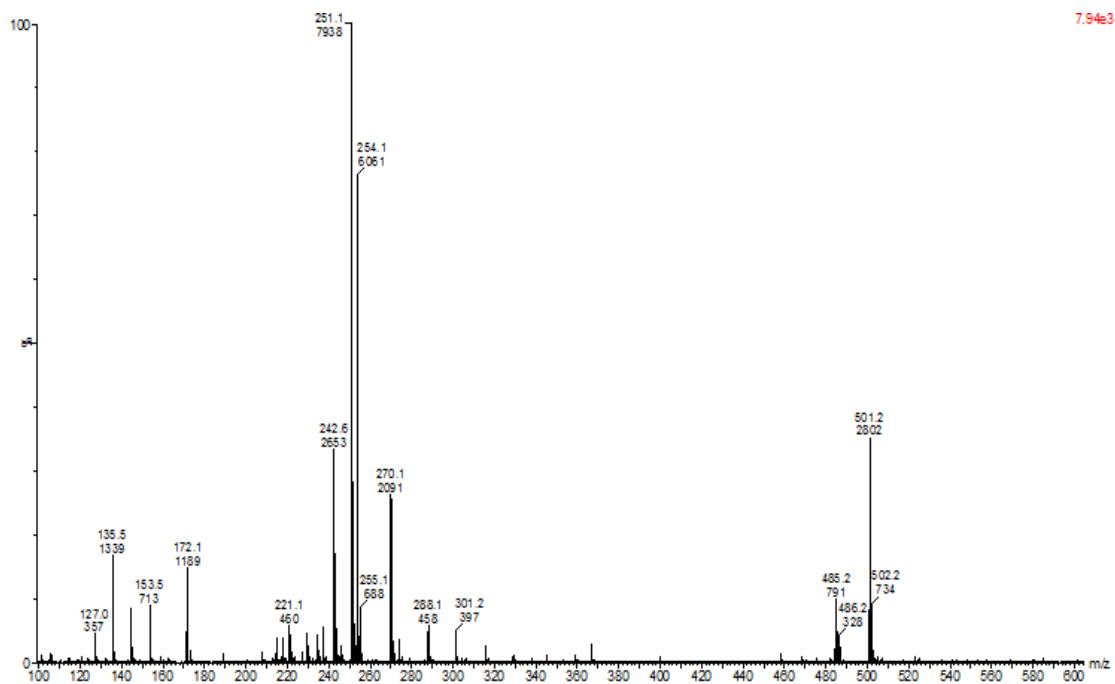

**Figure S3.** Mass spectrum of compound 1.

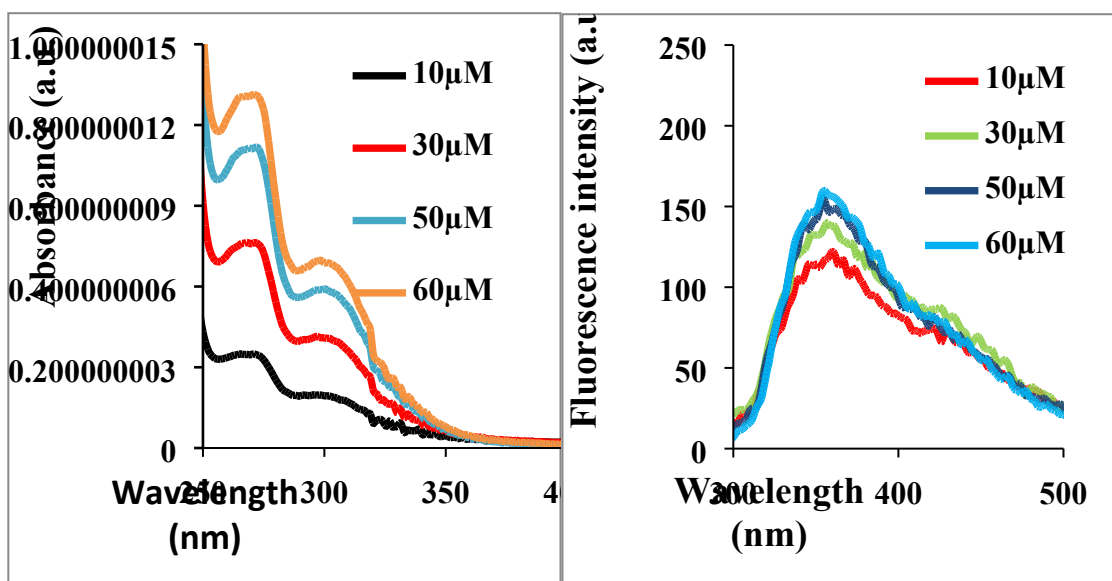

**Figure S4 (A).** Effect on UV-vis absorbance spectrum of compound 1, upon increasing the concentration of compound used for preparing the nanoaggregates; (B). Effect on fluorescence spectrum of compound 1, upon increasing the concentration of compound used for preparing the nanoaggregates.

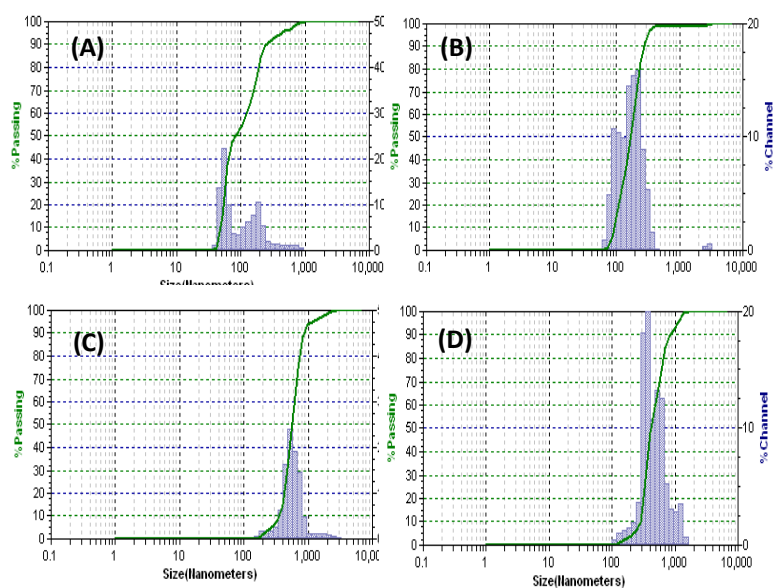

**Figure S5.** Effect on particle size of nanoaggregates, upon increasing the concentration of compound used for preparing the nanoaggregates.

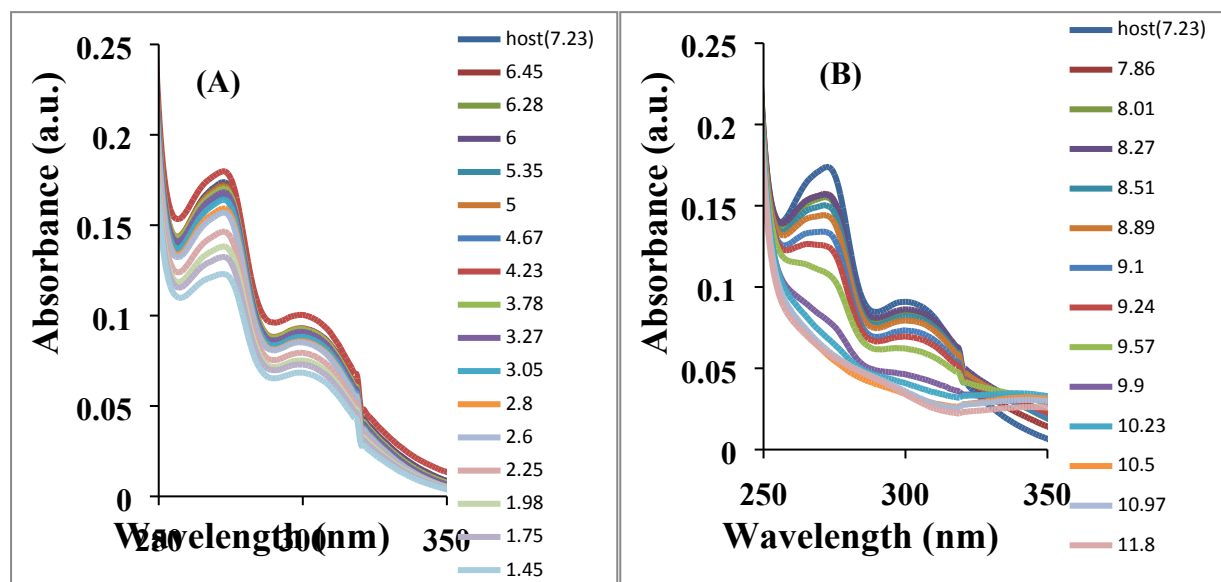

**Figure S6.** (A) Effect of addition of acid on organic nanomaterial N1 (ONP) ( $10 \mu\text{M}$ ); (B) Effect of addition of base on organic nanomaterial N1 (ONP) ( $10 \mu\text{M}$ ).

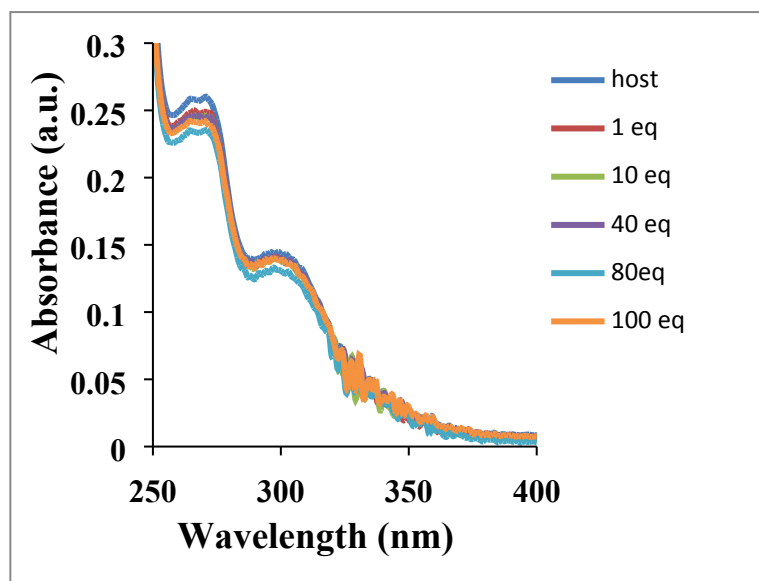

**Figure S7.** Effect of ionic strength on ONP N1 upon addition of 0- 100 equiv. of TBA salt of perchlorate.

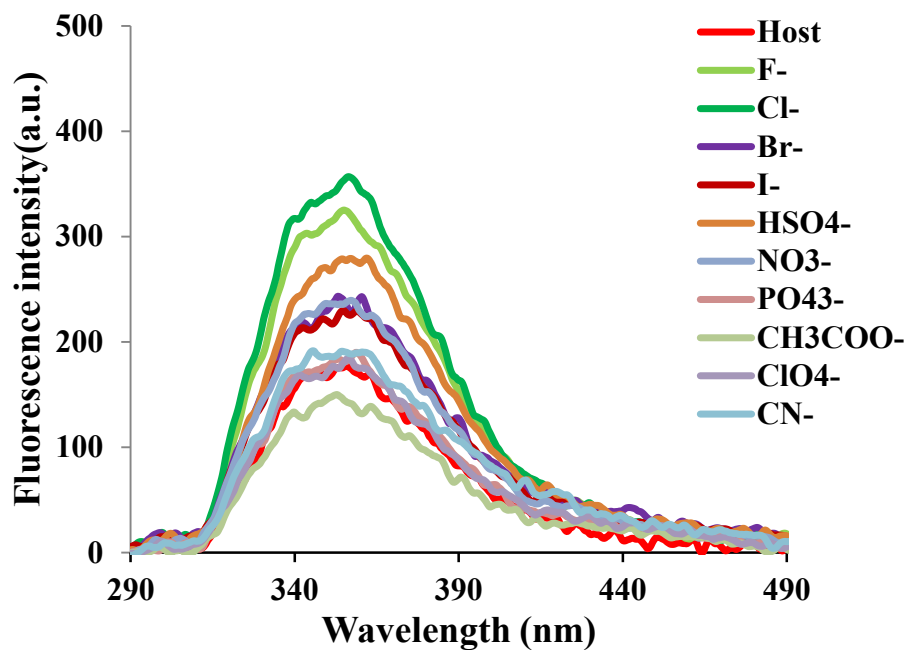

**Figure S8.** Change in emission spectra of ONP N1 (10 $\mu$ M) in water on addition of 40 $\mu$ M of TBA salts of anions (F<sup>-</sup>, Cl<sup>-</sup>, Br<sup>-</sup>, I<sup>-</sup>, NO<sub>3</sub><sup>-</sup>, CH<sub>3</sub>COO<sup>-</sup>, H<sub>2</sub>PO<sub>4</sub><sup>-</sup>, CN<sup>-</sup>, ClO<sub>4</sub><sup>-</sup>, HSO<sub>4</sub><sup>-</sup>).

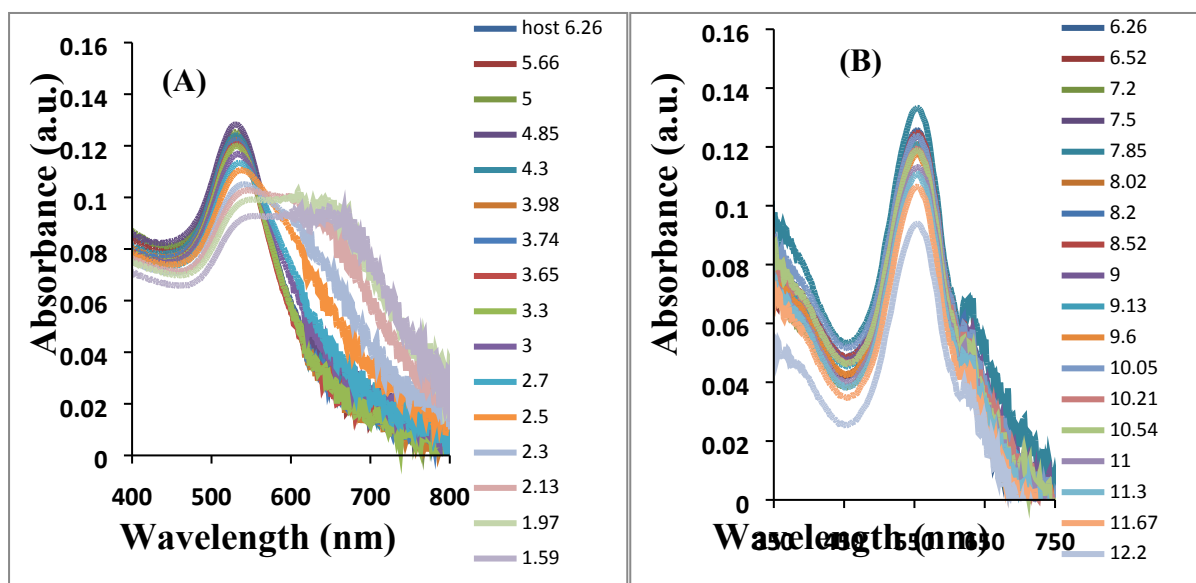

**Figure S9.** (A) Effect of addition of acid on hybrid nanomaterial **H1** (AuNP+ ONP) (0.1mM); (B) Effect of addition of base on hybrid nanomaterial **H1** (AuNP+ ONP) (0.1mM).

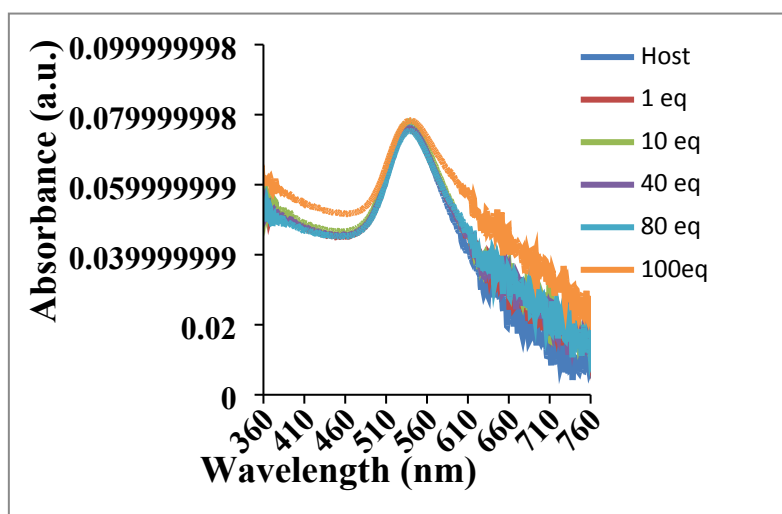

**Figure S10.** Effect of ionic strength on hybrid nanomaterial **H1** upon addition of 0- 100 equiv. of TBA salt of perchlorate.
